# Supplementary material for: Bioinformatic and Mechanistic Analysis of the Palmerolide PKS-NRPS Biosynthetic Pathway From the Microbiome of an Antarctic Ascidian
Source: PubMed Central journal article supplement (PMC8739492; doi:10.3389/fchem.2021.802574), 2021-12-24
Supplement: DataSheet1.pdf [file DataSheet1.pdf]

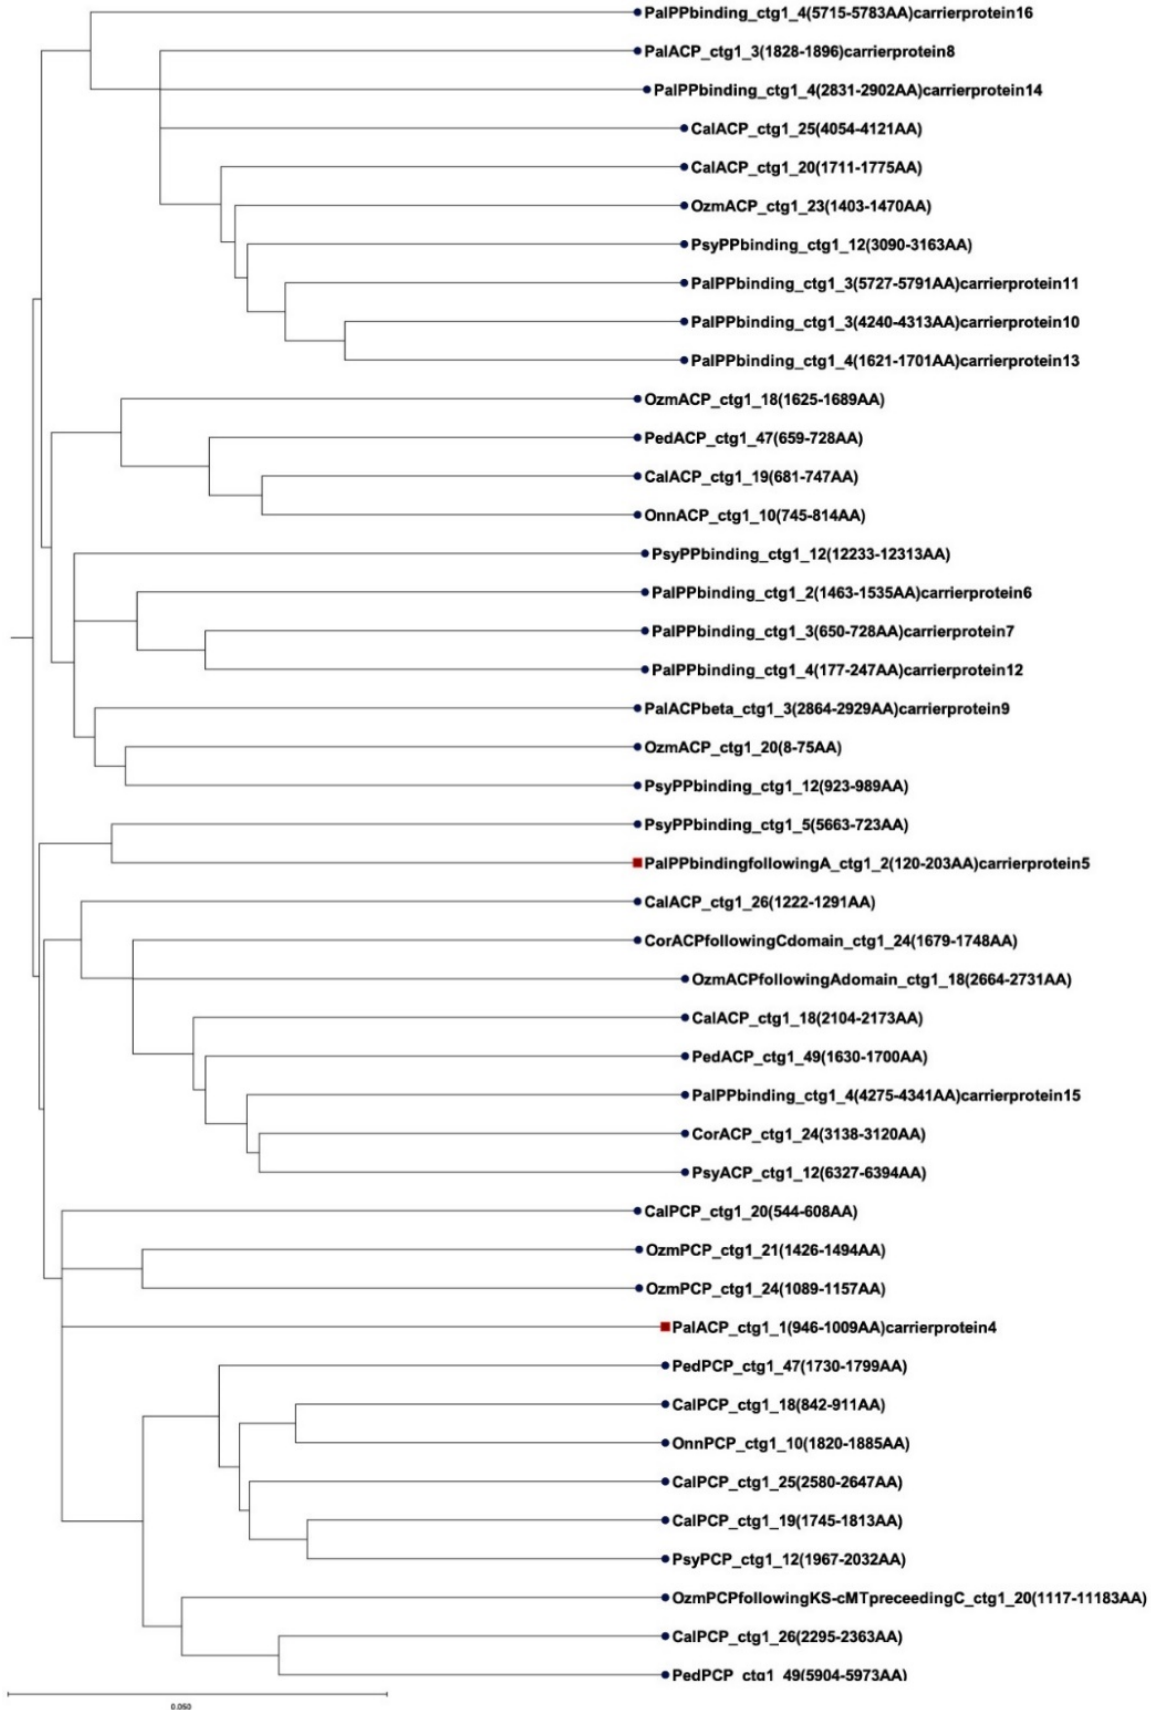

**Supplementary Figure 1.** Phylogenetic tree demonstrating the relationship between the third and fourth carrier proteins in the *pal* BGC with acyl-carrier proteins (ACPs) and peptidyl-carrier proteins (PCPs) from other hybrid PKS-NRPS systems. Though, an ACP would be expected at the end of module 1 (carrier protein 4) while a PCP would be expected at the end of module 2 (carrier protein 5), this is not what is observed bioinformatically. Carrier protein 4 was initially annotated as an ACP; however, is in the same clade as PCPs. Carrier protein 5 falls within the Pfam 00550.24 as a phosphopantetheine attachment site and is within the clade associated with ACPs.

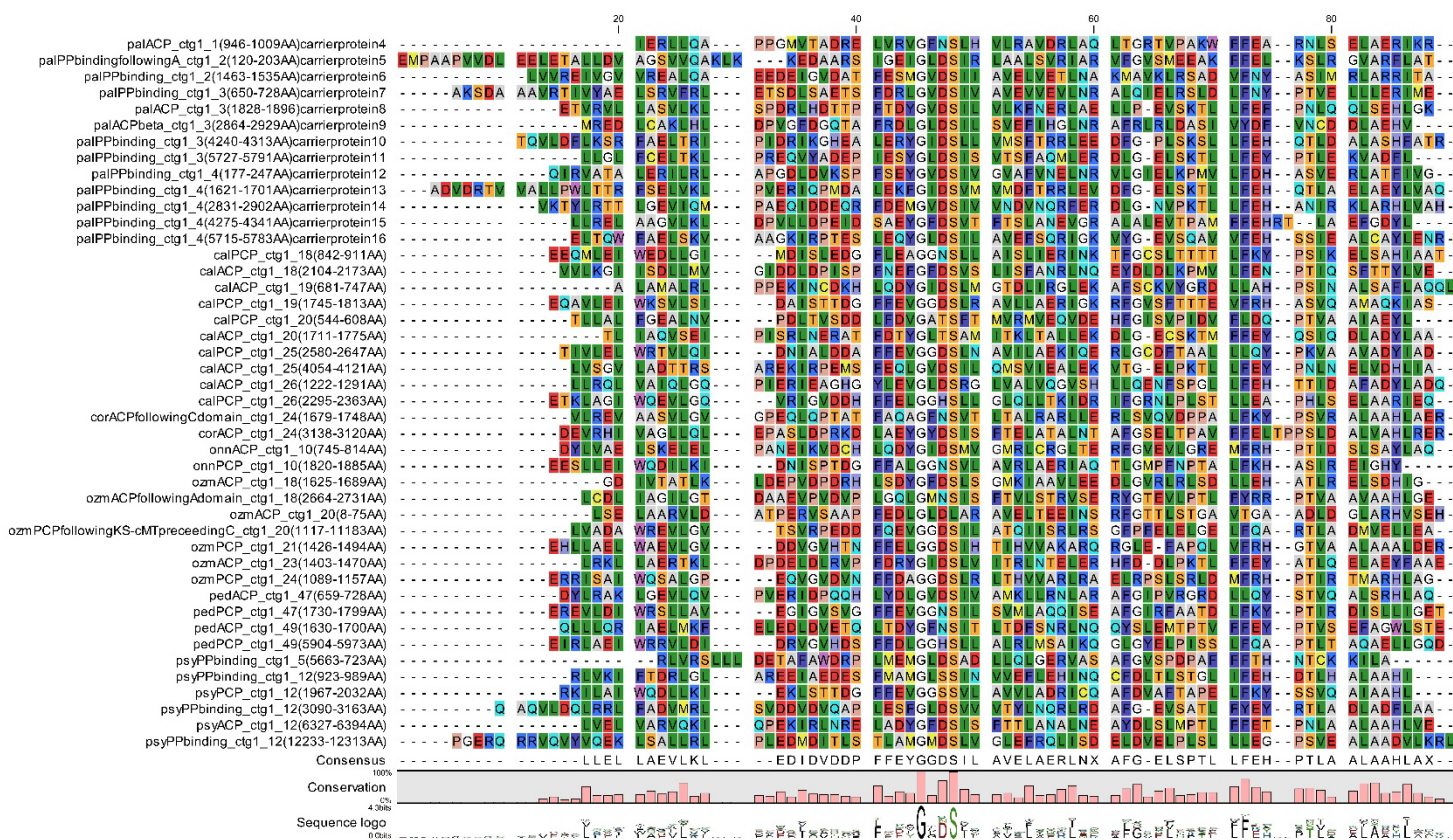

**Supplementary Figure 2.** Alignment of select carrier proteins in the *pal* BGC with acyl-carrier proteins (ACPs) and peptidyl-carrier proteins (PCPs) from other hybrid PKS-NRPS systems. The fifth carrier protein possess the (D/E)xGxDSL motif expected for a phosphopantetheine attachment site, though an isoleucine is present, rather than a leucine. This amino acid difference is not uncommon in other carrier proteins within PKS-NRPS BGCs.



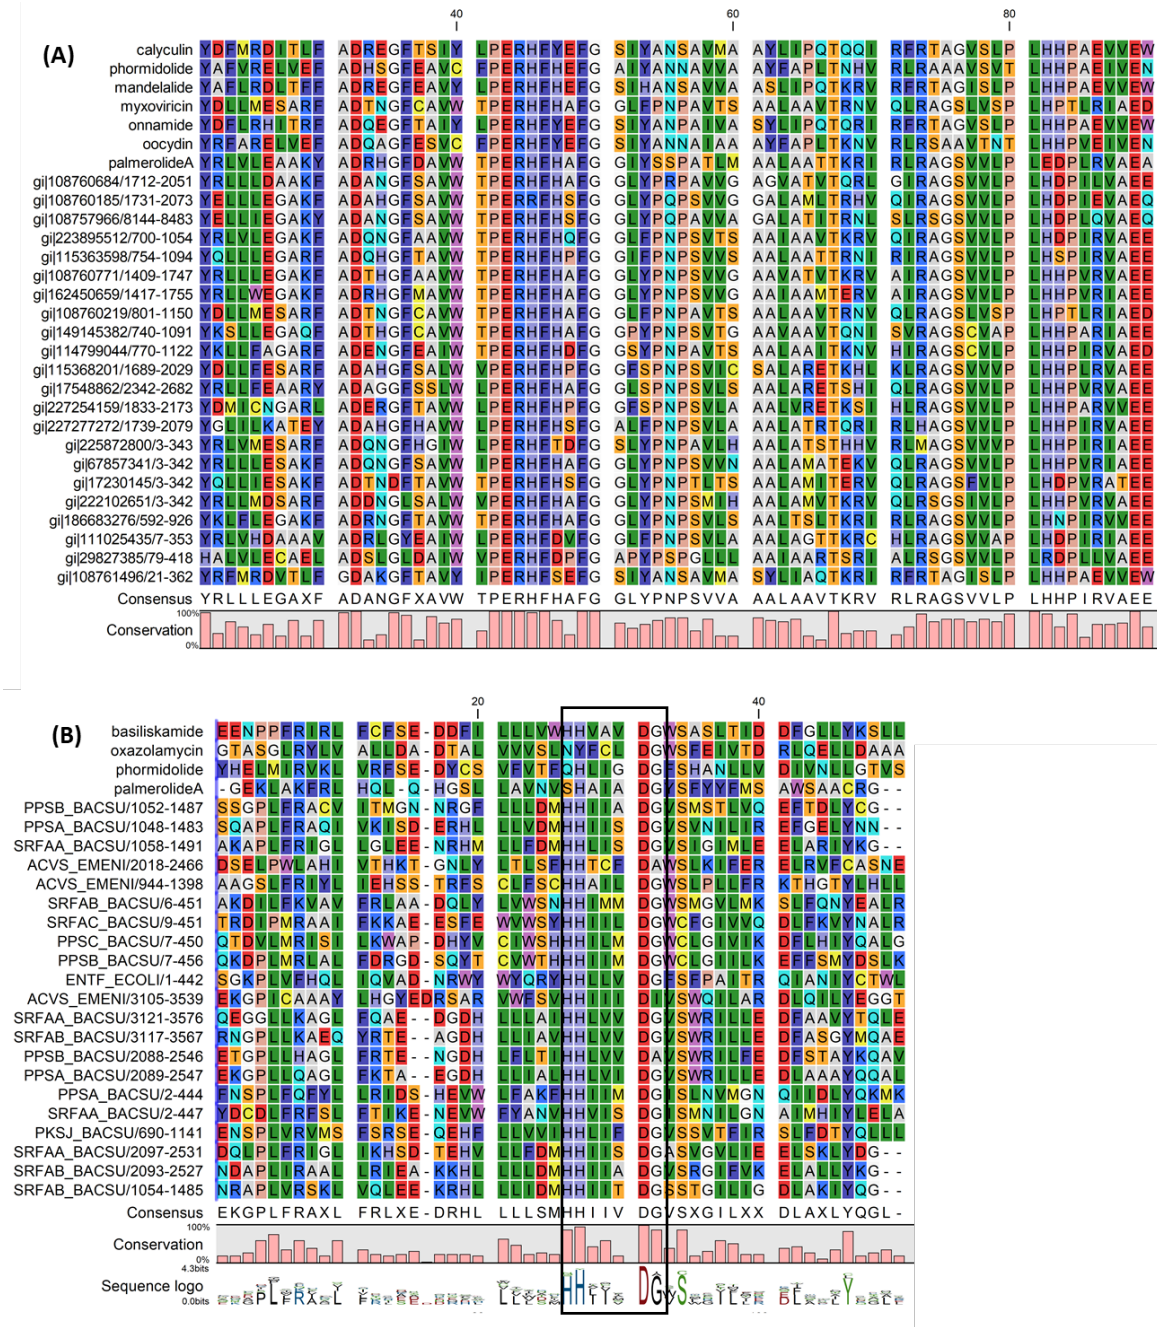

**Supplementary Figure 3.** (A) Alignment of the proposed palmerolide hydroxylase luciferase-like monooxygenase (LLM) with sequences from the TIGR subfamily 04020. (B) Alignment of the proposed termination condensation domain of the *pal* BGC\_4 with that of basiliskamide and phormidolide as well as the HMM seed sequences for PF00668 (condensation domains); conservation of the HHXXDGDG motif can be seen.

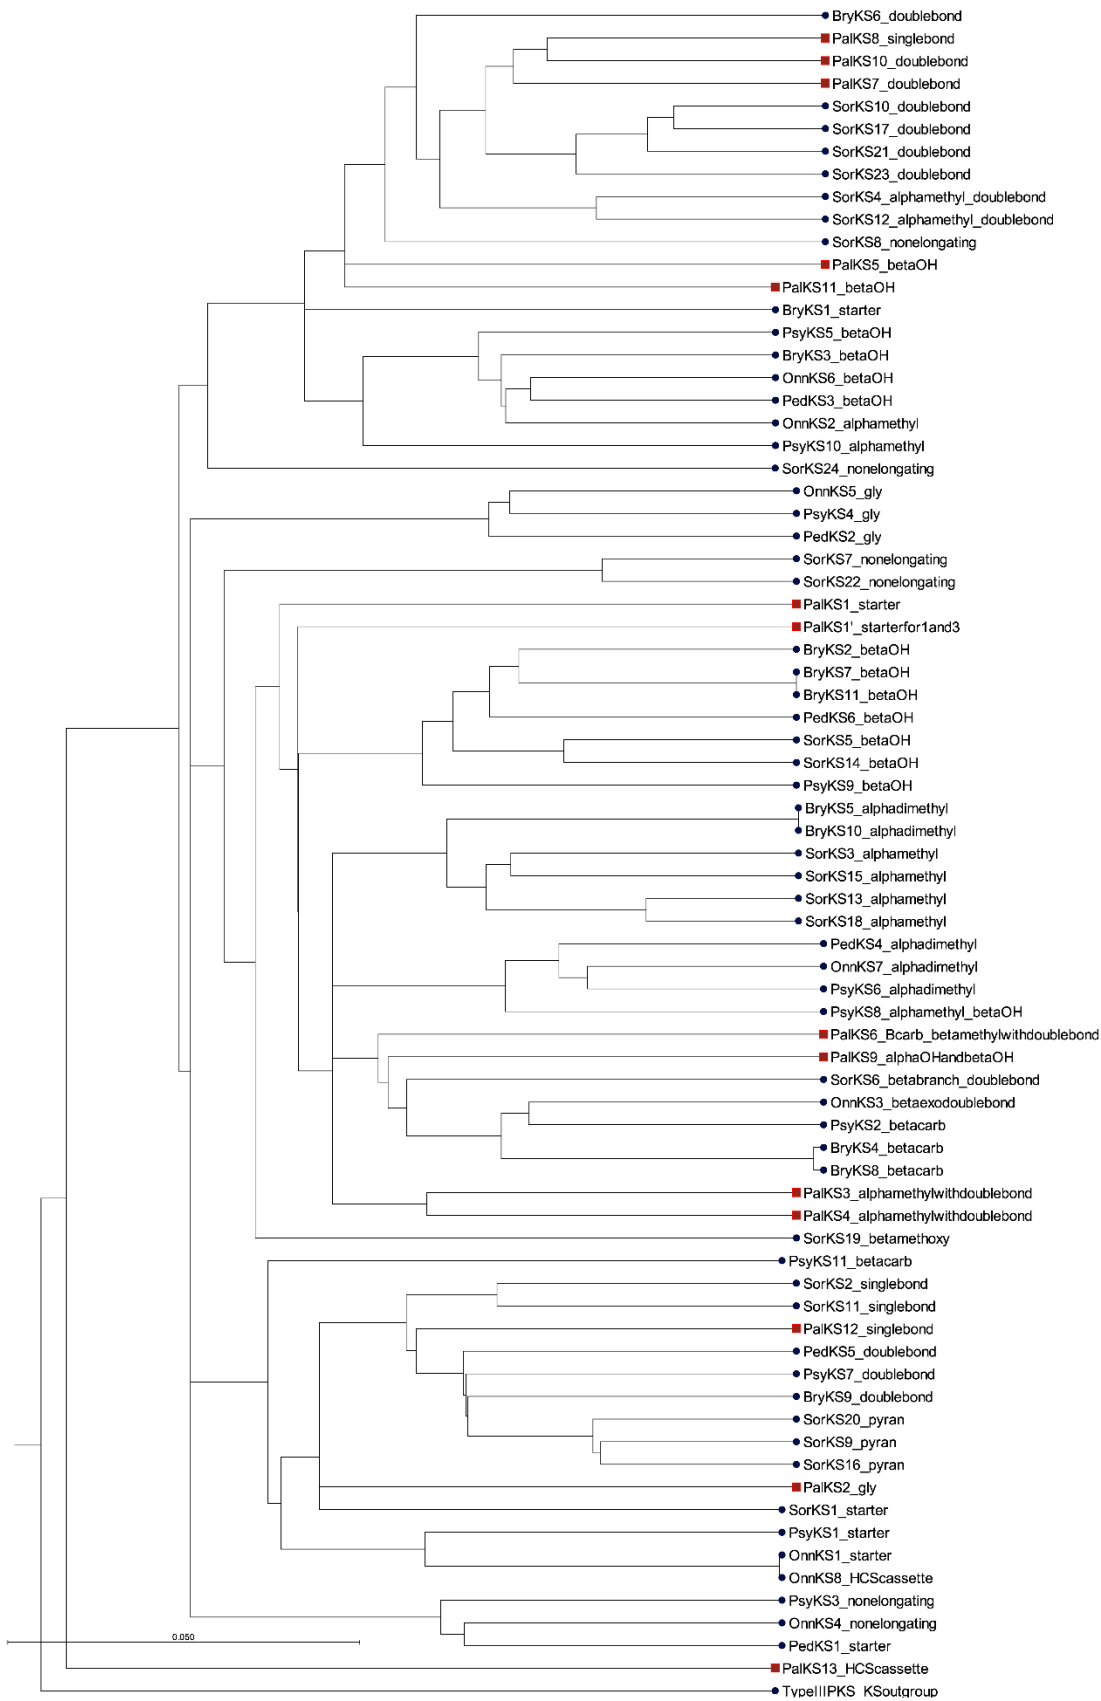

**Supplementary Figure 4.** Phylogenetic comparison of the amino acid sequences of the KS Pfam domains from the *pal* BGCs compared to those from the BGCs for bryostatin, onnamide, pederin, psymberin, and sorangicin. The KS domains are numbered based on their order for proposed biosynthesis. Though many of the PalKSs are within their own subclades, they show homology with enzymes of similar substrate affinity. PalKS1 and PalKS1' (from *pal* BGCs 1 and 3) fall within the same clade, though do not clade with the KSs accepting the starter unit in the BGCs for sorangicin, onnamide, and psymberin, and instead demonstrate more homology with KSs receiving methylated subunits. A *trans*-acting ER has been hypothesized to fully reduce the subunits containing C4-5 and C12-13 (module 12 and module 8), but interestingly, the phylogeny did not prove informative regarding the differentiation between KS modules receiving upstream olefins versus fully reduced subunits (PalKS8 and PalKS12). Additionally, PalKS9 is in a subclade that is distinct from those receiving reduced subunits with  $\beta$ -hydroxy groups and instead has greater homology to the KSs responsible for accepting  $\beta$ -functionalized subunits such as an  $\beta$ -exo double bond,  $\beta$ -branch, and  $\beta$ -branch with endo-double bond (PalKS6). This supports the mechanism of the LLM acting as an  $\alpha$ -hydroxylase while the elongating polyketide chain is online the biosynthetic megaenzyme and prior to the activity of the downstream module. Interestingly, PalKS13 which associated with the HCS cassette, is in a clade of its own. Note, the KS domain from the type III PKS BGC responsible for 3-(2'-hydroxy-3'-oxo-4'-methylpentyl)-indole biosynthesis from *Xenorhabdus bovienii* SS-2004 was used for an outgroup.



**Supplementary Figure 5.** The proposed BGC for *pal* BGC 1 which contains the same biosynthetic genes as *pal* BGC 3. The hybrid PKS-NRPS system has an additional elongation unit in *palA'* when compared to *palA*, seen at the beginning of the core biosynthetic genes. An ADP binding domain, a transposase, and a domain of unknown function (DUF697) are seen upstream of the core biosynthetic genes. KS: ketosynthase domain, C: condensation domain, gly: adenylation domain for glycine incorporation, DH: dehydratase domain, cMT: carbon methyl transferase domain, KR: ketoreductase domain, DHt: dehydratase variant, ECH: enoyl-CoA hydratase, LLM: luciferase-like monooxygenase, AT: acyltransferase; polysacc synt\_2: polysaccharide biosynthesis protein, LO: lactone oxidase, ABC trans: ATP-binding cassette transporter, Band7: stomatin-like integral membrane protein, SBP: bacterial extracellular solute-binding protein, PPTase: phosphopantetheinyl transferase, NMO: nitronante monooxygenase, HCS: hydroxymethylglutaryl-CoA synthase, GTF: glycosyl transferase, CT: carbamoyl transferase, small blue circles represent acyl- or peptidyl-carrier proteins. Blue arrows indicate biosynthetic genes. Green arrows indicate genes that encode for non-biosynthetic proteins. White arrows reflect genes that encode for hypothetical proteins. The BGC is displayed in reverse compliment.



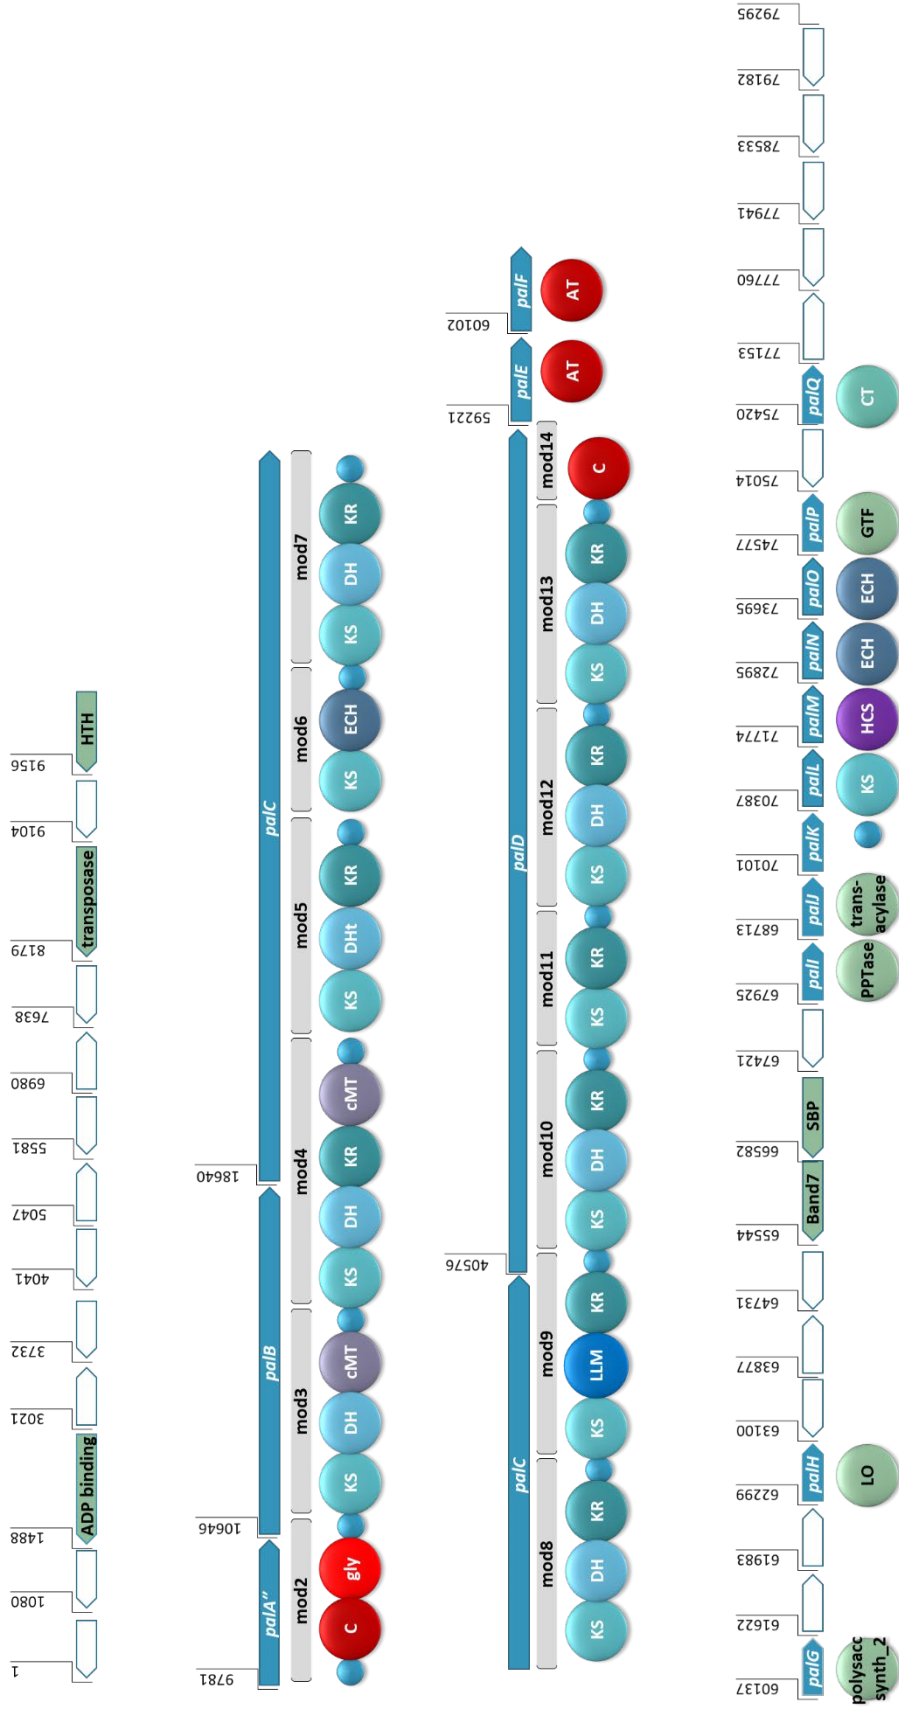

**Supplementary Figure 6.** The proposed BGC for *pal* BGC 5, showing the hybrid PKS-NRPS system lacking the PKS portion of *palA* and designated here as *palA''* with the preservation of the enzymes responsible for incorporation of the glycine subunit. An ADP binding domain, a transposase, and a domain of unknown function (DUF697) are seen upstream of the core biosynthetic genes. KS: ketosynthase domain, C: condensation domain, gly: adenylation domain for glycine incorporation, DH: dehydratase domain, cMT: carbon methyl transferase domain, KR: ketoreductase domain, DHt: dehydratase variant; ECH: enoyl-CoA hydratase, LLM: luciferase-like monooxygenase, AT: acyl transferase; polysacc synt\_2: polysaccharide biosynthesis protein, LO: lactone oxidase, ABC trans: ATP-binding cassette transporter, Band7: stomatin-like integral membrane, SBP: bacterial extracellular solute-binding protein, PPTase: phosphopantetheinyl transferase, NMO: nitronate monooxygenase, HCS: hydroxymethylglutaryl-CoA synthase, GTF: glycosyl transferase, CT: carbamoyl transferase, small blue circles represent acyl- or peptidyl-carrier proteins. Blue arrows indicate biosynthetic genes. Green arrows indicate genes that encode for non-biosynthetic proteins. White arrows reflect genes that encode for hypothetical proteins. The BGC is displayed in reverse compliment.

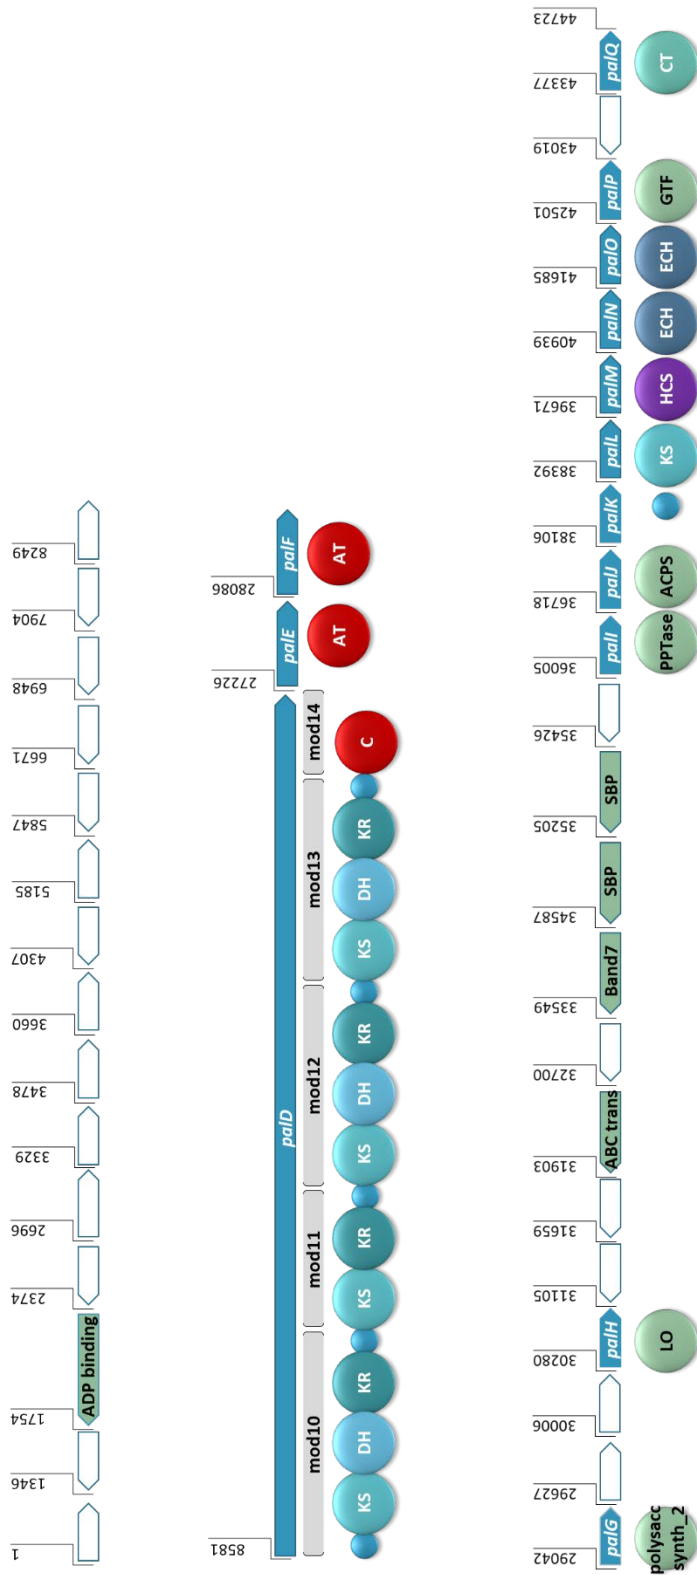

**Supplementary Figure 7.** The proposed BGC for *pal* BGC 2, showing the shortened BGC with no NRPS portion, seen at the beginning of the core biosynthetic genes. An ADP binding domain is

upstream of the core biosynthetic genes. The downstream tailoring enzymes are present, despite this cluster having the biosynthetic capability to only form an 8-carbon polyketide chain. KS: ketosynthase domain, C: condensation domain, DH: dehydratase domain, KR: ketoreductase domain, ECH: enoyl-CoA hydratase, AT: acyl transferase; polysacc synt\_2: polysaccharide biosynthesis protein, LO: lactone oxidase, ABC trans: ATP-binding cassette transporter, SBP: bacterial extracellular solute-binding protein, PPTase: phosphopantetheinyl transferase, ACPS: acyl carrier protein synthase; HCS: hydroxymethylglutaryl-CoA synthase, GTF: glycosyl transferase, CT: carbamoyl transferase, small blue circles represent acyl- or peptidyl-carrier proteins. Blue arrows indicate biosynthetic genes. Green arrows indicate genes that encode for non-biosynthetic proteins. White arrows reflect genes that encode for hypothetical proteins. The BGC is displayed in reverse complement.

**Supplementary Table 1.** GenBank Accession Numbers and versions for the genomes including the BGCs used in Figure 3 and Figure 4.

| <b>Compound</b>       | <b>BGC name</b> | <b>GenBank Accession</b> | <b>Version</b>    |
|-----------------------|-----------------|--------------------------|-------------------|
| <b>basiliskamide</b>  | <i>bas</i>      | NZ_AXBT01000013          | NZ_AXBT01000013.1 |
| <b>bryostatin 1</b>   | <i>bry</i>      | EF032014                 | EF032014.1        |
| <b>calyculin</b>      | <i>cal</i>      | AB933566                 | AB933566.1        |
| <b>corallopyronin</b> | <i>cor</i>      | HM071004                 | HM071004.1        |
| <b>mandelalide</b>    | <i>mnd</i>      | NJAL01000001             | NJAL01000001.1    |
| <b>onnamide</b>       | <i>onn</i>      | AY688304                 | AY688304.2        |
| <b>oocydin</b>        | <i>ooc</i>      | JX315604                 | JX315604.1        |
| <b>oxazolamycin</b>   | <i>ozm</i>      | EF552687                 | EF552687.1        |
| <b>pederin</b>        | <i>ped</i>      | AH013687                 | AH013687.2        |
| <b>phormidolide</b>   | <i>phm</i>      | KT727016                 | KT727016.1        |
| <b>psymberin</b>      | <i>psy</i>      | FJ823461                 | FJ823461.1        |
| <b>sorangicin</b>     | <i>sor</i>      | HM584908                 | HM584908.1        |
| <b>myxoviricin</b>    | <i>ta</i>       | NC_008095                | NC_008095.1       |

**Supplementary Table 2.** KS specificity predictions from *TransATor*. KS number designation is based on position in the pal BGC.

|              | <b>Predicted specificity</b>           | <b><i>TransATor</i> Clade</b> | <b><i>TransATor</i> Clade specificity</b> | <b>e-value</b> | <b>score</b> |
|--------------|----------------------------------------|-------------------------------|-------------------------------------------|----------------|--------------|
| <b>KS_1</b>  | $\beta$ -branch with Double Bond       | 104                           | $\beta$ -O-Me or $\beta$ -Me double bond  | 1.10E-140      | 462          |
| <b>KS_2</b>  | Gly_Single Bond                        | 96                            | various specificities                     | 5.00E-171      | 562          |
| <b>KS_3</b>  | Double Bond with -Me                   | 2                             | $\alpha$ -Me shifted double bond or OH    | 3.20E-189      | 622          |
| <b>KS_4</b>  | Double Bond with -Me                   | 2                             | $\alpha$ -Me shifted double bond or OH    | 6.50E-191      | 627          |
| <b>KS_5</b>  | Secondary <sub>D</sub> -OH             | 53                            | $\beta$ - <sub>D</sub> -OH                | 1.50E-192      | 633          |
| <b>KS_6</b>  | B-carb, $\beta$ -meth with Double Bond | 2                             | $\alpha$ -Me shifted double bond or OH    | 9.70E-192      | 630          |
| <b>KS_7</b>  | Double Bond                            | 101                           | double bonds                              | 4.20E-212      | 697          |
| <b>KS_8</b>  | Single Bond                            | 101                           | double bonds                              | 4.40E-214      | 704          |
| <b>KS_9</b>  | Secondary -OH                          | 104                           | $\beta$ -O-Me or $\beta$ -Me double bond  | 9.50E-192      | 630          |
| <b>KS_10</b> | Double Bond                            | 127                           | double bonds (E-config)                   | 1.40E-209      | 689          |
| <b>KS_11</b> | Secondary <sub>D</sub> -OH             | 53                            | $\beta$ - <sub>D</sub> -OH                | 8.90E-198      | 650          |
| <b>KS_12</b> | Single Bond                            | 96                            | various specificities                     | 1.20E-197      | 650          |
| <b>KS_13</b> | HCS Cassette                           | 79                            | starters or $\beta$ -OH                   | 6.30E-36       | 117          |
